# Supplementary material
Source: PubMed Central journal article supplement (PMC4163522)
Supplement: NIHMS612589-supplement-01.pdf [file NIHMS612589-supplement-01.pdf]

**Supplementary Table 1: Common Lipid Species Between Normotensive and Hypertensive Female DBA/2J Aqueous Humor**

| Lipid Species <sup>a</sup>                        | Theoretical m/z <sup>b</sup> | m/z   | Error (Da) | Normotensive                                                  |                        | Hypertensive                                                  |                        | Fold change <sup>c</sup> |
|---------------------------------------------------|------------------------------|-------|------------|---------------------------------------------------------------|------------------------|---------------------------------------------------------------|------------------------|--------------------------|
|                                                   |                              |       |            | Average normalized lipid amount (pmol per species/μg protein) | Standard error of mean | Average normalized lipid amount (pmol per species/μg protein) | Standard error of mean |                          |
| <b>Sphingomyelin</b>                              |                              |       |            |                                                               |                        |                                                               |                        |                          |
| SM(d16:1/17:0)                                    | 689.6                        | 689.3 | -0.3       | 2.5                                                           | 0.9                    | 6.9                                                           | 2.4                    | 1.5                      |
| SM(d16:1/22:0) <sup>d</sup>                       | 759.6                        | 760.4 | 0.8        | 3.8                                                           | 1.4                    | 44.8                                                          | 15.8                   | 3.5                      |
| SM(d16:1/25:0) <sup>d</sup>                       | 801.7                        | 801.9 | 0.2        | 2.0                                                           | 0.7                    | 1.9                                                           | 0.7                    | -0.1                     |
| SM(d17:0/27:0) <sup>d</sup>                       | 845.7                        | 845.5 | -0.2       | 26.5                                                          | 9.4                    | 3.0                                                           | 1.1                    | -3.1                     |
| SM(d17:1/17:0) <sup>d</sup>                       | 703.6                        | 703.2 | -0.4       | 63.3                                                          | 22.4                   | 4.4                                                           | 1.6                    | -3.8                     |
| SM(d17:1/22:0) <sup>d</sup>                       | 773.7                        | 774.3 | 0.7        | 11.8                                                          | 4.2                    | 1.7                                                           | 0.6                    | -2.8                     |
| SM(d17:1/24:1) <sup>d</sup>                       | 799.7                        | 799.1 | -0.6       | 156.0                                                         | 55.2                   | 147.2                                                         | 52.0                   | -0.1                     |
| SM(d18:0/12:0) <sup>d</sup>                       | 649.5                        | 649.9 | 0.4        | 144.1                                                         | 50.9                   | 112.6                                                         | 39.8                   | -0.4                     |
| SM(d18:0/13:0) <sup>d</sup>                       | 663.5                        | 663.1 | -0.4       | 347.3                                                         | 122.8                  | 5.1                                                           | 1.8                    | -6.1 *                   |
| SM(d18:0/14:0)                                    | 677.6                        | 677.6 | 0.0        | 29.9                                                          | 10.6                   | 5.1                                                           | 1.8                    | -2.5                     |
| SM(d18:0/15:0)                                    | 691.6                        | 690.7 | -0.9       | 43.9                                                          | 15.5                   | 4.8                                                           | 1.7                    | -3.2                     |
| SM(d18:0/16:0) <sup>d</sup>                       | 705.6                        | 705.0 | -0.6       | 11.2                                                          | 4.0                    | 2.7                                                           | 1.0                    | -2.0                     |
| SM(d18:0/17:0) <sup>d</sup>                       | 719.6                        | 720.3 | 0.7        | 30.8                                                          | 10.9                   | 6.1                                                           | 2.2                    | -2.3                     |
| SM(d18:0/18:1(9Z)) <sup>d</sup>                   | 731.6                        | 732.3 | 0.7        | 59.0                                                          | 20.9                   | 46.5                                                          | 16.4                   | -0.3                     |
| SM(d18:0/24:1(15Z))                               | 815.7                        | 816.1 | 0.4        | 110.3                                                         | 39.0                   | 5.9                                                           | 2.1                    | -4.2                     |
| SM(d18:1/12:0) <sup>d</sup>                       | 647.5                        | 647.3 | -0.2       | 32.1                                                          | 11.4                   | 4.0                                                           | 1.4                    | -3.0                     |
| SM(d18:1/16:1) <sup>d</sup>                       | 701.6                        | 702.0 | 0.5        | 7.5                                                           | 2.6                    | 20.0                                                          | 7.1                    | 1.4                      |
| SM(d18:1/17:0) <sup>d</sup>                       | 717.6                        | 717.3 | -0.3       | 31.3                                                          | 11.1                   | 103.6                                                         | 36.6                   | 1.7                      |
| SM(d18:1/19:0) <sup>d</sup>                       | 745.6                        | 746.1 | 0.5        | 19.2                                                          | 6.8                    | 12.6                                                          | 4.4                    | -0.6                     |
| SM(d18:1/22:0)                                    | 787.7                        | 786.3 | -1.4       | 28.9                                                          | 10.2                   | 4.1                                                           | 1.5                    | -2.8                     |
| SM(d18:1/24:1(15Z)) <sup>d</sup>                  | 813.7                        | 813.9 | 0.2        | 0.2                                                           | 0.1                    | 2.2                                                           | 0.8                    | 3.7                      |
| SM(d18:1/26:1(17Z)) <sup>d</sup>                  | 841.7                        | 840.8 | -0.9       | 15.2                                                          | 5.4                    | 7.5                                                           | 2.6                    | -1.0                     |
| SM(d18:2/14:0) <sup>d</sup>                       | 673.5                        | 673.4 | -0.2       | 109.6                                                         | 38.7                   | 8.6                                                           | 3.1                    | -3.7                     |
| SM(d18:2/15:0) <sup>d</sup>                       | 687.5                        | 686.9 | -0.7       | 34.9                                                          | 12.3                   | 10.3                                                          | 3.6                    | -1.8                     |
| SM(d18:2/18:1) <sup>d</sup>                       | 727.6                        | 727.7 | 0.1        | 15.9                                                          | 5.6                    | 7.0                                                           | 2.5                    | -1.2                     |
| SM(d18:2/20:1) <sup>d</sup>                       | 755.6                        | 755.1 | -0.5       | 23.6                                                          | 8.3                    | 5.8                                                           | 2.1                    | -2.0                     |
| SM(d18:2/21:0) <sup>d</sup>                       | 771.6                        | 771.6 | 0.0        | 775.4                                                         | 274.2                  | 10.2                                                          | 3.6                    | -6.3 *                   |
| SM(d18:2/24:1) <sup>d</sup>                       | 811.7                        | 811.3 | -0.3       | 30.0                                                          | 10.6                   | 90.2                                                          | 31.9                   | 1.6                      |
| SM(d19:1/24:1) <sup>d</sup>                       | 827.7                        | 828.5 | 0.8        | 26.0                                                          | 9.2                    | 10.2                                                          | 3.6                    | -1.3                     |
| SM(d20:0/24:1)                                    | 843.7                        | 843.8 | 0.0        | 86.4                                                          | 30.6                   | 0.4                                                           | 0.1                    | -7.7 *                   |
| <b>Sphingoid base</b>                             |                              |       |            |                                                               |                        |                                                               |                        |                          |
| (4E,6E,d14:2) sphingosine <sup>d</sup>            | 242.2                        | 242.8 | 0.6        | 8.8                                                           | 3.1                    | 19.7                                                          | 6.9                    | 1.2                      |
| (4E,8E,10E-d18:3)sphingosine <sup>d</sup>         | 296.3                        | 297.2 | 0.9        | 7.3                                                           | 2.6                    | 3.6                                                           | 1.3                    | -1.0                     |
| 6-hydroxysphingosine <sup>d</sup>                 | 316.3                        | 316.5 | 0.3        | 0.7                                                           | 0.2                    | 0.4                                                           | 0.1                    | -0.7                     |
| C16 Sphinganine <sup>d</sup>                      | 274.3                        | 273.9 | -0.3       | 0.3                                                           | 0.1                    | 0.5                                                           | 0.2                    | 0.9                      |
| C17 Sphinganine <sup>d</sup>                      | 288.3                        | 287.6 | -0.7       | 2.5                                                           | 0.9                    | 3.4                                                           | 1.2                    | 0.4                      |
| Calyxinin <sup>d</sup>                            | 487.4                        | 486.8 | -0.7       | 4.3                                                           | 1.5                    | 1.1                                                           | 0.4                    | -2.0                     |
| Capnine <sup>d</sup>                              | 352.3                        | 352.2 | -0.1       | 8.2                                                           | 2.9                    | 6.3                                                           | 2.2                    | -0.4                     |
| Fumonisin B2 <sup>d</sup>                         | 706.4                        | 706.6 | 0.2        | 15.5                                                          | 5.5                    | 0.4                                                           | 0.1                    | -5.2 *                   |
| Fumonisin B4 <sup>d</sup>                         | 690.4                        | 689.6 | -0.9       | 15.5                                                          | 5.5                    | 0.5                                                           | 0.2                    | -5.0 *                   |
| Fumonisin C1                                      | 708.4                        | 708.6 | 0.2        | 7.7                                                           | 2.7                    | 2.0                                                           | 0.7                    | -2.0                     |
| Fumonisin C3                                      | 692.4                        | 693.3 | 0.9        | 5.4                                                           | 1.9                    | 2.6                                                           | 0.9                    | -1.1                     |
| Hemsleyin imine A <sup>d</sup>                    | 606.6                        | 606.5 | -0.1       | 0.2                                                           | 0.1                    | 0.1                                                           | 0.0                    | -1.1                     |
| iso (4E,15-methyl-d16:1) sphingosine <sup>d</sup> | 286.3                        | 287.2 | 0.9        | 0.3                                                           | 0.1                    | 0.0                                                           | 0.0                    | -8.4 *                   |
| N,N,N-trimethyl-sphingosine <sup>d</sup>          | 343.3                        | 343.4 | 0.0        | 1.6                                                           | 0.6                    | 0.5                                                           | 0.2                    | -1.6                     |
| N,N-dimethylsphingosine <sup>d</sup>              | 328.3                        | 328.3 | 0.0        | 6.2                                                           | 2.2                    | 21.3                                                          | 7.5                    | 1.8                      |
| Obscuraminol A <sup>d</sup>                       | 278.2                        | 278.6 | 0.4        | 3.6                                                           | 1.3                    | 1.9                                                           | 0.7                    | -0.9                     |

|                                 |       |       |      |     |     |      |     |        |
|---------------------------------|-------|-------|------|-----|-----|------|-----|--------|
| Penazetidine A <sup>d</sup>     | 370.4 | 370.1 | -0.3 | 0.2 | 0.1 | 7.1  | 2.5 | 5.3 *  |
| Phytosphingosine <sup>d</sup>   | 318.3 | 318.6 | 0.3  | 0.7 | 0.2 | 2.1  | 0.7 | 1.6    |
| Plakoside A <sup>d</sup>        | 948.8 | 949.5 | 0.8  | 5.7 | 2.0 | 7.9  | 2.8 | 0.5    |
| Prosafrinine <sup>d</sup>       | 284.3 | 284.5 | 0.2  | 0.4 | 0.1 | 0.1  | 0.0 | -2.0   |
| R-Dysidazirine <sup>d</sup>     | 308.3 | 308.1 | -0.1 | 3.9 | 1.4 | 0.1  | 0.0 | -6.9 * |
| Rhizochalinin D <sup>d</sup>    | 647.5 | 648.4 | 0.9  | 2.2 | 0.8 | 0.2  | 0.1 | -3.7   |
| Sphinganine <sup>d</sup>        | 302.3 | 302.4 | 0.1  | 0.1 | 0.0 | 0.1  | 0.0 | -1.2   |
| Sphingofungin A <sup>d</sup>    | 432.3 | 433.2 | 0.9  | 1.2 | 0.4 | 0.2  | 0.1 | -2.3   |
| Sphingofungin E <sup>d</sup>    | 418.3 | 417.7 | -0.6 | 0.6 | 0.2 | 0.2  | 0.1 | -1.8   |
| Sulfamisterin <sup>d</sup>      | 462.2 | 461.7 | -0.5 | 1.3 | 0.4 | 0.7  | 0.2 | -0.9   |
| Termitomycesphin A <sup>d</sup> | 744.6 | 744.4 | -0.2 | 0.1 | 0.0 | 5.2  | 1.9 | 6.4 *  |
| Xestoaminol C <sup>d</sup>      | 230.2 | 229.6 | -0.6 | 0.2 | 0.1 | 15.0 | 5.3 | 6.2 *  |

---

**Sphingoid base-1-phosphate**

---

|                                           |       |       |      |     |     |       |      |        |
|-------------------------------------------|-------|-------|------|-----|-----|-------|------|--------|
| C16 Sphinganine-1-phosphate <sup>d</sup>  | 352.2 | 352.3 | 0.1  | 1.8 | 0.6 | 58.5  | 20.7 | 5.0 *  |
| C17 Sphinganine-1-phosphate <sup>d</sup>  | 366.2 | 365.6 | -0.6 | 1.2 | 0.4 | 114.8 | 40.6 | 6.6 *  |
| C17 Sphingosine-1-phosphate <sup>d</sup>  | 364.2 | 364.6 | 0.3  | 0.1 | 0.0 | 3.3   | 1.2  | 6.5 *  |
| C19 Sphingosine-1-phosphate <sup>d</sup>  | 392.3 | 391.5 | -0.8 | 0.3 | 0.1 | 1.9   | 0.7  | 2.7    |
| Phytosphingosine 1-phosphate <sup>d</sup> | 396.3 | 396.0 | -0.3 | 0.1 | 0.0 | 39.8  | 14.1 | 12.2 * |

---

**Ceramides**

---

|                                      |       |       |      |       |       |       |       |         |
|--------------------------------------|-------|-------|------|-------|-------|-------|-------|---------|
| Cer(d16:1/17:0) <sup>d</sup>         | 522.5 | 521.6 | -0.9 | 4.8   | 1.7   | 38.3  | 13.5  | 3.0     |
| Cer(d16:1/22:0)                      | 592.6 | 591.8 | -0.8 | 4.5   | 1.6   | 11.4  | 4.0   | 1.3     |
| Cer(d18:0/13:0) <sup>d</sup>         | 496.5 | 496.4 | -0.1 | 4.3   | 1.5   | 23.1  | 8.2   | 2.4     |
| Cer(d18:0/14:0) <sup>d</sup>         | 510.5 | 511.4 | 0.9  | 254.7 | 90.1  | 351.7 | 124.4 | 0.5     |
| Cer(d18:0/16:0) <sup>d</sup>         | 538.5 | 538.7 | 0.1  | 756.4 | 267.4 | 427.3 | 151.1 | -0.8    |
| Cer(d18:0/17:0) <sup>d</sup>         | 552.5 | 553.1 | 0.6  | 0.1   | 0.0   | 20.6  | 7.3   | 10.5 *  |
| Cer(d18:0/h17:0) <sup>d</sup>        | 568.5 | 569.3 | 0.7  | 9.3   | 3.3   | 11.8  | 4.2   | 0.3     |
| Cer(d18:0/h24:0) <sup>d</sup>        | 666.6 | 667.4 | 0.8  | 0.2   | 0.1   | 1.0   | 0.3   | 2.3     |
| Cer(d18:1/22:0)                      | 620.6 | 620.1 | -0.5 | 7.5   | 2.7   | 0.1   | 0.1   | -7.5 *  |
| Cer(d18:1/26:0) <sup>d</sup>         | 676.7 | 677.0 | 0.3  | 4.8   | 1.7   | 2.1   | 0.7   | -1.2    |
| Cer(d18:1/26:1(17Z)) <sup>d</sup>    | 674.6 | 674.2 | -0.4 | 3.6   | 1.3   | 0.1   | 0.0   | -9.1 *  |
| Cer(d18:2/14:0) <sup>d</sup>         | 506.5 | 506.9 | 0.5  | 43.7  | 15.4  | 48.2  | 17.0  | 0.1     |
| Cer(d18:2/16:0) <sup>d</sup>         | 534.5 | 535.3 | 0.8  | 70.3  | 24.9  | 211.3 | 74.7  | 1.6     |
| Cer(d18:2/20:0) <sup>d</sup>         | 590.6 | 591.0 | 0.4  | 6.7   | 2.4   | 0.1   | 0.0   | -13.1 * |
| Cer(d18:2/21:0) <sup>d</sup>         | 604.6 | 604.6 | 0.1  | 1.7   | 0.6   | 0.1   | 0.0   | -4.9    |
| Cer(d18:2/23:0) <sup>d</sup>         | 632.6 | 631.7 | -0.9 | 2.9   | 1.0   | 6.8   | 2.4   | 1.2     |
| Cer(t18:0/26:0)                      | 694.7 | 694.1 | -0.6 | 2.9   | 1.0   | 0.1   | 0.0   | -8.2 *  |
| CerP(d18:0/16:0) <sup>d</sup>        | 618.5 | 618.9 | 0.4  | 2.0   | 0.7   | 2.4   | 0.9   | 0.3     |
| CerP(d18:1/14:0) <sup>d</sup>        | 588.4 | 588.2 | -0.2 | 12.8  | 4.5   | 2.1   | 0.8   | -2.6    |
| CerP(d18:1/22:0)                     | 700.6 | 700.7 | 0.2  | 0.1   | 0.0   | 0.1   | 0.0   | -2.2    |
| CerP(d18:1/24:0)                     | 728.6 | 728.2 | -0.4 | 0.8   | 0.3   | 12.9  | 4.6   | 4.0     |
| CerP(d18:1/24:1(15Z)) <sup>d</sup>   | 726.6 | 726.4 | -0.2 | 3.1   | 1.1   | 8.0   | 2.8   | 1.4     |
| Ins-1-P-Cer(d18:1/22:0) <sup>d</sup> | 862.6 | 863.3 | 0.7  | 1.1   | 0.4   | 2.7   | 1.0   | 1.3     |
| SM(d16:1/24:0) <sup>d</sup>          | 785.7 | 785.5 | -0.1 | 0.2   | 0.1   | 0.1   | 0.0   | -4.1    |
| SM(d16:1/24:1)                       | 783.6 | 783.3 | -0.3 | 2.0   | 0.7   | 1.7   | 0.6   | -0.2    |
| SM(d16:1/25:0) <sup>d</sup>          | 799.7 | 800.5 | 0.8  | 3.5   | 1.2   | 0.1   | 0.0   | -13.3 * |
| SM(d17:1/24:1) <sup>d</sup>          | 797.7 | 796.8 | -0.9 | 2.3   | 0.8   | 0.1   | 0.0   | -6.4 *  |
| SM(d18:0/13:0) <sup>d</sup>          | 661.5 | 661.9 | 0.3  | 2.5   | 0.9   | 0.8   | 0.3   | -1.6    |
| SM(d18:0/16:0) <sup>d</sup>          | 703.6 | 702.7 | -0.9 | 0.2   | 0.1   | 0.1   | 0.1   | -2.1    |
| SM(d18:0/26:0) <sup>d</sup>          | 843.7 | 844.0 | 0.3  | 1.0   | 0.4   | 2.8   | 1.0   | 1.5     |
| SM(d18:0/26:1(17Z))                  | 841.7 | 841.0 | -0.7 | 0.2   | 0.1   | 1.2   | 0.4   | 2.8     |
| SM(d18:1/12:0) <sup>d</sup>          | 645.5 | 645.9 | 0.4  | 0.1   | 0.0   | 4.8   | 1.7   | 5.2 *   |
| SM(d18:1/14:0) <sup>d</sup>          | 673.5 | 674.0 | 0.5  | 0.2   | 0.1   | 1.4   | 0.5   | 3.0     |
| SM(d18:1/16:1) <sup>d</sup>          | 699.5 | 700.4 | 0.8  | 7.8   | 2.7   | 0.1   | 0.0   | -10.2 * |
| SM(d18:1/17:0) <sup>d</sup>          | 715.6 | 715.8 | 0.2  | 2.5   | 0.9   | 39.1  | 13.8  | 4.0     |
| SM(d18:1/24:0) <sup>d</sup>          | 813.7 | 813.1 | -0.5 | 38.4  | 13.6  | 1.6   | 0.6   | -4.6    |
| SM(d18:1/24:1(15Z)) <sup>d</sup>     | 811.7 | 811.4 | -0.3 | 7.5   | 2.6   | 11.5  | 4.1   | 0.6     |
| SM(d18:1/25:0)                       | 827.7 | 827.5 | -0.2 | 0.6   | 0.2   | 2.3   | 0.8   | 2.0     |
| SM(d18:1/26:1(17Z)) <sup>d</sup>     | 839.7 | 840.6 | 0.9  | 1.3   | 0.5   | 0.1   | 0.0   | -4.2    |

|                             |       |       |     |     |     |     |     |      |
|-----------------------------|-------|-------|-----|-----|-----|-----|-----|------|
| SM(d18:2/14:0) <sup>d</sup> | 671.5 | 671.7 | 0.2 | 1.9 | 0.7 | 2.1 | 0.8 | 0.2  |
| SM(d18:2/15:0) <sup>d</sup> | 685.5 | 685.8 | 0.3 | 6.1 | 2.1 | 2.4 | 0.8 | -1.3 |
| SM(d18:2/25:0) <sup>d</sup> | 825.7 | 826.6 | 1.0 | 2.2 | 0.8 | 2.5 | 0.9 | 0.1  |
| SM(d19:1/18:0) <sup>d</sup> | 743.6 | 744.0 | 0.4 | 4.1 | 1.4 | 3.2 | 1.1 | -0.4 |

---

<sup>a</sup>The lipid species identification is based on Lipidmaps database, used as a \*.csv file for bioinformatic analyses with MZmine 2.9 program. <sup>b</sup>The theoretical mass by charge ratio (m/z) presented from Lipidmaps is in positive ion mode [M+H]<sup>+</sup> for sphingomyelin and sphingoid base. Whereas negative ion mode [M-H]<sup>-</sup> has been presented for sphingoid base-1-phosphate and ceramides. Error in Da has been provided from theoretical data. Average standard normalized dataset is presented here. For some lipid species identified, standard error of mean value could not be calculated due to lack of presence in all samples. Species that are known bonafide lipids of non-mammalian origin were excluded. However, where the origin in mammalian or human is unclear those entities were retained. <sup>c</sup>Fold change (fc) is the ratio relative to control based on a log<sub>2</sub> scale: \*|fc| ≥ 5.0. <sup>d</sup>Lipids common to females and males.

**Supplementary Table 2: Common Lipid Species Between Normotensive and Hypertensive Male DBA/2J Aqueous Humor**

| Lipid Species <sup>a</sup>                        | Theoretical m/z <sup>b</sup> | m/z   | Error (Da) | Normotensive                                                  |                        | Hypertensive                                                  |                        | Fold change <sup>c</sup> |
|---------------------------------------------------|------------------------------|-------|------------|---------------------------------------------------------------|------------------------|---------------------------------------------------------------|------------------------|--------------------------|
|                                                   |                              |       |            | Average normalized lipid amount (pmol per species/μg protein) | Standard error of mean | Average normalized lipid amount (pmol per species/μg protein) | Standard error of mean |                          |
| <b>Sphingomyelin</b>                              |                              |       |            |                                                               |                        |                                                               |                        |                          |
| SM(d16:0/20:0)                                    | 733.6                        | 734.0 | 0.4        | 14.5                                                          | 6.5                    | 17.9                                                          | 6.3                    | 0.3                      |
| SM(d16:0/22:0)                                    | 761.7                        | 762.5 | 0.8        | 586.2                                                         | 207.2                  | 3.8                                                           | 1.3                    | -7.3 *                   |
| SM(d16:1/22:0) <sup>d</sup>                       | 759.6                        | 758.7 | -0.9       | 17.3                                                          | 6.1                    | 2.1                                                           | 0.7                    | -3.1                     |
| SM(d16:1/25:0) <sup>d</sup>                       | 801.7                        | 802.6 | 0.9        | 13.6                                                          | 4.8                    | 20.8                                                          | 7.4                    | 0.6                      |
| SM(d17:0/27:0) <sup>d</sup>                       | 845.7                        | 846.6 | 0.8        | 21.4                                                          | 7.6                    | 39.4                                                          | 13.9                   | 0.9                      |
| SM(d17:1/17:0) <sup>d</sup>                       | 703.6                        | 702.8 | -0.8       | 17.7                                                          | 6.3                    | 22.3                                                          | 7.9                    | 0.3                      |
| SM(d17:1/24:1) <sup>d</sup>                       | 799.7                        | 799.0 | -0.7       | 18.0                                                          | 6.3                    | 10.5                                                          | 3.7                    | -0.8                     |
| SM(d18:0/12:0) <sup>d</sup>                       | 649.5                        | 649.4 | -0.1       | 115.0                                                         | 40.6                   | 240.9                                                         | 85.2                   | 1.1                      |
| SM(d18:0/16:0) <sup>d</sup>                       | 663.5                        | 663.0 | -0.6       | 15.1                                                          | 5.3                    | 31.4                                                          | 11.1                   | 1.1                      |
| SM(d18:0/17:0) <sup>d</sup>                       | 705.6                        | 706.1 | 0.5        | 202.3                                                         | 71.5                   | 4.9                                                           | 1.7                    | -5.4 *                   |
| SM(d18:0/17:0) <sup>d</sup>                       | 719.6                        | 720.3 | 0.7        | 8.9                                                           | 3.1                    | 5.4                                                           | 1.9                    | -0.7                     |
| SM(d18:0/18:1(9Z)) <sup>d</sup>                   | 731.6                        | 732.4 | 0.8        | 7.5                                                           | 2.7                    | 9.9                                                           | 3.5                    | 0.4                      |
| SM(d18:0/22:0)                                    | 789.7                        | 790.4 | 0.7        | 55.2                                                          | 19.5                   | 33.5                                                          | 11.8                   | -0.7                     |
| SM(d18:0/24:0) <sup>d</sup>                       | 817.7                        | 817.8 | 0.1        | 14.4                                                          | 5.1                    | 105.0                                                         | 37.1                   | 2.9                      |
| SM(d18:1/12:0) <sup>d</sup>                       | 647.5                        | 646.8 | -0.7       | 136.7                                                         | 48.3                   | 37.8                                                          | 13.4                   | -1.9                     |
| SM(d18:1/16:1) <sup>d</sup>                       | 701.6                        | 700.6 | -0.9       | 242.6                                                         | 85.8                   | 73.2                                                          | 25.9                   | -1.7                     |
| SM(d18:1/17:0) <sup>d</sup>                       | 717.6                        | 716.8 | -0.8       | 43.8                                                          | 15.5                   | 17.7                                                          | 6.3                    | -1.3                     |
| SM(d18:1/19:0) <sup>d</sup>                       | 745.6                        | 746.2 | 0.6        | 95.3                                                          | 33.7                   | 29.5                                                          | 10.4                   | -1.7                     |
| SM(d18:1/24:1(15Z)) <sup>d</sup>                  | 813.7                        | 812.9 | -0.8       | 9.0                                                           | 3.2                    | 8.1                                                           | 2.9                    | -0.1                     |
| SM(d18:1/26:1(17Z)) <sup>d</sup>                  | 841.7                        | 841.6 | -0.1       | 26.6                                                          | 9.4                    | 87.4                                                          | 30.9                   | 1.7                      |
| SM(d18:2/14:0) <sup>d</sup>                       | 673.5                        | 672.6 | -1.0       | 86.7                                                          | 30.6                   | 99.4                                                          | 35.2                   | 0.2                      |
| SM(d18:2/15:0) <sup>d</sup>                       | 687.5                        | 687.0 | -0.5       | 11.9                                                          | 4.2                    | 5.4                                                           | 1.9                    | -1.1                     |
| SM(d18:2/18:1) <sup>d</sup>                       | 727.6                        | 728.4 | 0.8        | 18.9                                                          | 6.7                    | 39.9                                                          | 14.1                   | 1.1                      |
| SM(d18:2/20:1) <sup>d</sup>                       | 755.6                        | 754.8 | -0.8       | 20.6                                                          | 7.3                    | 26.0                                                          | 9.2                    | 0.3                      |
| SM(d18:2/21:0) <sup>d</sup>                       | 771.6                        | 771.3 | -0.4       | 99.6                                                          | 35.2                   | 19.3                                                          | 6.8                    | -2.4                     |
| SM(d18:2/24:1) <sup>d</sup>                       | 811.7                        | 812.2 | 0.5        | 83.2                                                          | 29.4                   | 37.8                                                          | 13.4                   | -1.1                     |
| SM(d19:0/24:1)                                    | 829.7                        | 830.5 | 0.8        | 47.0                                                          | 16.6                   | 1.0                                                           | 0.4                    | -5.5 *                   |
| SM(d19:1/24:1) <sup>d</sup>                       | 827.7                        | 827.4 | -0.3       | 69.8                                                          | 24.7                   | 1.9                                                           | 0.7                    | -5.2 *                   |
| <b>Sphingoid base</b>                             |                              |       |            |                                                               |                        |                                                               |                        |                          |
| (4E,6E,d14:2) sphingosine <sup>d</sup>            | 242.2                        | 242.7 | 0.5        | 5.7                                                           | 2.0                    | 0.8                                                           | 0.3                    | -2.8                     |
| (4E,8E,10E-d18:3)sphingosine <sup>d</sup>         | 296.3                        | 297.1 | 0.9        | 1.1                                                           | 0.4                    | 0.1                                                           | 0.0                    | -14.6 *                  |
| (4E,8Z,d18:2) sphingosine                         | 298.3                        | 299.0 | 0.8        | 0.2                                                           | 0.1                    | 0.1                                                           | 0.0                    | -4.4                     |
| 6-hydroxysphingosine <sup>d</sup>                 | 316.3                        | 317.0 | 0.7        | 2.2                                                           | 0.8                    | 0.1                                                           | 0.0                    | -4.2                     |
| C16 Sphinganine <sup>d</sup>                      | 274.3                        | 273.3 | -0.9       | 0.5                                                           | 0.2                    | 0.3                                                           | 0.1                    | -0.5                     |
| C17 Sphinganine <sup>d</sup>                      | 288.3                        | 287.5 | -0.8       | 1.2                                                           | 0.4                    | 0.1                                                           | 0.0                    | -5.8 *                   |
| Calyxinin <sup>d</sup>                            | 487.4                        | 487.0 | -0.5       | 2.9                                                           | 1.0                    | 0.9                                                           | 0.3                    | -1.7                     |
| Capnine <sup>d</sup>                              | 352.3                        | 352.5 | 0.2        | 0.8                                                           | 0.3                    | 3.6                                                           | 1.3                    | 2.1                      |
| Fumonisin B2 <sup>d</sup>                         | 706.4                        | 705.5 | -0.9       | 5.6                                                           | 2.0                    | 0.9                                                           | 0.3                    | -2.6                     |
| Fumonisin B4 <sup>d</sup>                         | 690.4                        | 690.3 | -0.1       | 2.9                                                           | 1.0                    | 2.7                                                           | 1.0                    | -0.1                     |
| Hemsleyin imine A <sup>d</sup>                    | 606.6                        | 605.6 | -0.9       | 0.4                                                           | 0.1                    | 0.2                                                           | 0.1                    | -1.0                     |
| iso (4E,15-methyl-d16:1) sphingosine <sup>d</sup> | 286.3                        | 288.0 | 1.7        | 0.1                                                           | 0.0                    | 0.1                                                           | 0.0                    | -2.0                     |
| N,N,N-trimethyl-sphingosine <sup>d</sup>          | 343.3                        | 343.6 | 0.2        | 1.2                                                           | 0.4                    | 0.3                                                           | 0.1                    | -2.2                     |
| N,N-dimethylsphingosine <sup>d</sup>              | 328.3                        | 328.9 | 0.6        | 7.4                                                           | 2.6                    | 1.0                                                           | 0.4                    | -2.9                     |
| Obscuraminol A <sup>d</sup>                       | 278.2                        | 278.3 | 0.0        | 0.1                                                           | 0.0                    | 0.1                                                           | 0.0                    | 0.3                      |
| Penazetidine A <sup>d</sup>                       | 370.4                        | 371.0 | 0.6        | 0.2                                                           | 0.1                    | 1.2                                                           | 0.4                    | 2.5                      |
| Phytosphingosine <sup>d</sup>                     | 318.3                        | 319.1 | 0.8        | 0.3                                                           | 0.1                    | 0.1                                                           | 0.0                    | -3.5                     |
| Plakoside A <sup>d</sup>                          | 948.8                        | 947.9 | -0.9       | 0.1                                                           | 0.0                    | 0.1                                                           | 0.1                    | 0.0                      |
| Prosafrinine <sup>d</sup>                         | 284.3                        | 285.3 | 1.0        | 0.1                                                           | 0.0                    | 0.2                                                           | 0.1                    | 0.6                      |
| R-Dysidazirine <sup>d</sup>                       | 308.3                        | 307.3 | -1.0       | 0.1                                                           | 0.0                    | 0.1                                                           | 0.0                    | 6.2 *                    |
| Rhizochalinin D <sup>d</sup>                      | 647.5                        | 647.0 | -0.6       | 2.9                                                           | 1.0                    | 0.1                                                           | 0.0                    | -6.4 *                   |

|                                 |       |       |      |     |     |     |     |      |
|---------------------------------|-------|-------|------|-----|-----|-----|-----|------|
| Sphinganine <sup>d</sup>        | 302.3 | 301.3 | -1.0 | 0.1 | 0.0 | 0.3 | 0.1 | 4.2  |
| Sphingofungin A <sup>d</sup>    | 432.3 | 433.3 | 1.0  | 3.5 | 1.2 | 4.0 | 1.4 | 0.2  |
| Sphingofungin E <sup>d</sup>    | 418.3 | 419.3 | 1.0  | 2.9 | 1.0 | 0.4 | 0.2 | -2.7 |
| Sulfamisterin <sup>d</sup>      | 462.2 | 463.1 | 0.9  | 1.7 | 0.6 | 1.0 | 0.4 | -0.8 |
| Termitomycesphin A <sup>d</sup> | 744.6 | 743.9 | -0.7 | 0.7 | 0.3 | 0.1 | 0.0 | -4.7 |
| Xestoaminol C <sup>d</sup>      | 230.2 | 229.5 | -0.7 | 0.8 | 0.3 | 0.8 | 0.3 | 0.0  |

#### Sphingoid base-1-phosphate

|                                           |       |       |      |      |     |       |      |       |
|-------------------------------------------|-------|-------|------|------|-----|-------|------|-------|
| C16 Sphinganine-1-phosphate <sup>d</sup>  | 352.2 | 351.3 | -0.9 | 0.8  | 0.3 | 109.3 | 38.6 | 7.2 * |
| C16 Sphingosine-1-phosphate               | 350.2 | 349.3 | -1.0 | 4.2  | 1.5 | 12.7  | 4.5  | 1.6   |
| C17 Sphinganine-1-phosphate <sup>d</sup>  | 366.2 | 365.5 | -0.8 | 19.8 | 7.0 | 3.8   | 1.3  | -2.4  |
| C17 Sphingosine-1-phosphate <sup>d</sup>  | 364.2 | 365.0 | 0.8  | 0.6  | 0.2 | 12.3  | 4.3  | 4.4   |
| C19 Sphingosine-1-phosphate <sup>d</sup>  | 392.3 | 392.8 | 0.5  | 0.4  | 0.2 | 12.4  | 4.4  | 4.8   |
| Phytosphingosine 1-phosphate <sup>d</sup> | 396.3 | 395.5 | -0.8 | 0.5  | 0.2 | 14.3  | 5.1  | 4.8   |

#### Ceramides

|                                      |       |       |      |       |      |       |       |        |
|--------------------------------------|-------|-------|------|-------|------|-------|-------|--------|
| Cer(d16:1/17:0) <sup>d</sup>         | 522.5 | 522.1 | -0.3 | 10.2  | 3.6  | 10.1  | 3.6   | 0.0    |
| Cer(d18:0/13:0) <sup>d</sup>         | 496.5 | 495.9 | -0.5 | 3.7   | 1.3  | 11.2  | 4.0   | 1.6    |
| Cer(d18:0/14:0) <sup>d</sup>         | 510.5 | 510.5 | 0.0  | 205.5 | 72.6 | 187.7 | 66.4  | -0.1   |
| Cer(d18:0/16:0) <sup>d</sup>         | 538.5 | 538.7 | 0.2  | 23.5  | 8.3  | 184.4 | 65.2  | 3.0    |
| Cer(d18:0/17:0) <sup>d</sup>         | 552.5 | 551.8 | -0.8 | 1.5   | 0.5  | 0.6   | 0.2   | -1.3   |
| Cer(d18:0/18:1(9Z))                  | 564.5 | 563.6 | -0.9 | 0.1   | 0.0  | 0.2   | 0.1   | 0.5    |
| Cer(d18:0/h17:0) <sup>d</sup>        | 568.5 | 568.6 | 0.1  | 1.7   | 0.6  | 0.2   | 0.1   | -2.8   |
| Cer(d18:0/h24:0) <sup>d</sup>        | 666.6 | 665.7 | -0.9 | 74.1  | 26.2 | 3.5   | 1.2   | -4.4   |
| Cer(d18:1/26:0) <sup>d</sup>         | 676.7 | 676.3 | -0.3 | 4.1   | 1.4  | 0.1   | 0.0   | -5.4 * |
| Cer(d18:2/14:0) <sup>d</sup>         | 506.5 | 506.7 | 0.2  | 10.3  | 3.7  | 33.0  | 11.7  | 1.7    |
| Cer(d18:2/16:0) <sup>d</sup>         | 534.5 | 533.6 | -0.9 | 72.4  | 25.6 | 130.0 | 45.9  | 0.8    |
| Cer(d18:2/20:0) <sup>d</sup>         | 590.6 | 591.5 | 0.9  | 2.7   | 1.0  | 5.0   | 1.8   | 0.9    |
| Cer(d18:2/21:0) <sup>d</sup>         | 604.6 | 604.1 | -0.5 | 3.1   | 1.1  | 6.5   | 2.3   | 1.1    |
| Cer(d18:2/23:0) <sup>d</sup>         | 632.6 | 631.6 | -1.0 | 0.1   | 0.1  | 2.4   | 0.9   | 4.0    |
| CerP(d18:0/16:0) <sup>d</sup>        | 618.5 | 619.3 | 0.8  | 2.9   | 1.0  | 6.8   | 2.4   | 1.2    |
| CerP(d18:1/14:0) <sup>d</sup>        | 588.4 | 589.1 | 0.7  | 12.0  | 4.2  | 4.7   | 1.7   | -1.4   |
| CerP(d18:1/24:1(15Z)) <sup>d</sup>   | 726.6 | 726.9 | 0.3  | 65.9  | 23.3 | 5.9   | 2.1   | -3.5   |
| Ins-1-P-Cer(d18:1/22:0) <sup>d</sup> | 862.6 | 862.2 | -0.4 | 6.7   | 2.4  | 2.0   | 0.7   | -1.8   |
| SM(d16:1/22:1)                       | 755.6 | 755.9 | 0.3  | 18.9  | 6.7  | 0.4   | 0.1   | -5.6 * |
| SM(d16:1/24:0) <sup>d</sup>          | 785.7 | 784.7 | -1.0 | 1.1   | 0.4  | 0.8   | 0.3   | -0.6   |
| SM(d16:1/25:0) <sup>d</sup>          | 799.7 | 798.9 | -0.8 | 1.6   | 0.6  | 0.4   | 0.2   | -1.9   |
| SM(d17:1/22:0) <sup>d</sup>          | 771.6 | 770.7 | -0.9 | 0.7   | 0.3  | 0.1   | 0.0   | -4.9   |
| SM(d17:1/24:1) <sup>d</sup>          | 797.7 | 798.2 | 0.6  | 2.4   | 0.8  | 0.1   | 0.0   | -5.5 * |
| SM(d18:0/13:0) <sup>d</sup>          | 661.5 | 661.6 | 0.1  | 1.5   | 0.5  | 3.3   | 1.2   | 1.1    |
| SM(d18:0/16:0) <sup>d</sup>          | 703.6 | 703.8 | 0.3  | 4.4   | 1.6  | 0.2   | 0.1   | -4.6   |
| SM(d18:0/18:0)                       | 731.6 | 730.7 | -0.9 | 1.0   | 0.4  | 0.1   | 0.0   | -3.0   |
| SM(d18:0/24:0) <sup>d</sup>          | 815.7 | 816.3 | 0.6  | 277.7 | 98.2 | 425.0 | 150.3 | 0.6    |
| SM(d18:0/26:0) <sup>d</sup>          | 843.7 | 843.1 | -0.6 | 1.8   | 0.6  | 0.1   | 0.0   | -4.7   |
| SM(d18:1/12:0) <sup>d</sup>          | 645.5 | 646.4 | 0.9  | 0.8   | 0.3  | 0.3   | 0.1   | -1.5   |
| SM(d18:1/14:0) <sup>d</sup>          | 673.5 | 673.4 | -0.1 | 4.3   | 1.5  | 0.1   | 0.0   | -6.8 * |
| SM(d18:1/17:0) <sup>d</sup>          | 715.6 | 714.9 | -0.6 | 146.8 | 51.9 | 38.9  | 13.8  | -1.9   |
| SM(d18:1/20:0)                       | 757.6 | 758.5 | 0.9  | 1.5   | 0.5  | 3.4   | 1.2   | 1.2    |
| SM(d18:1/24:0) <sup>d</sup>          | 813.7 | 813.7 | 0.0  | 7.6   | 2.7  | 81.9  | 29.0  | 3.4    |
| SM(d18:1/24:1(15Z)) <sup>d</sup>     | 811.7 | 811.8 | 0.1  | 20.0  | 7.1  | 0.5   | 0.2   | -5.3 * |
| SM(d18:1/26:1(17Z)) <sup>d</sup>     | 839.7 | 840.1 | 0.4  | 6.3   | 2.2  | 32.6  | 11.5  | 2.4    |
| SM(d18:2/14:0) <sup>d</sup>          | 671.5 | 670.5 | -1.0 | 1.8   | 0.7  | 1.5   | 0.5   | -0.3   |
| SM(d18:2/21:0) <sup>d</sup>          | 769.6 | 770.6 | 1.0  | 184.3 | 65.2 | 1.8   | 0.7   | -6.6 * |
| SM(d18:2/22:1)                       | 781.6 | 782.2 | 0.6  | 1.4   | 0.5  | 1.5   | 0.5   | 0.1    |
| SM(d18:2/25:0) <sup>d</sup>          | 825.7 | 825.8 | 0.1  | 2.7   | 1.0  | 0.7   | 0.2   | -2.0   |
| SM(d19:1/18:0) <sup>d</sup>          | 743.6 | 744.6 | 1.0  | 14.7  | 5.2  | 7.3   | 2.6   | -1.0   |

<sup>a</sup>The lipid species identification is based on Lipidmaps database, used as a \*.csv file for bioinformatic analyses with MZmine 2.9 program. <sup>b</sup>The theoretical mass by charge ratio (m/z) presented from Lipidmaps is in positive ion mode [M+H]<sup>+</sup> for sphingomyelin and sphingoid base. Whereas negative ion mode [M-H]<sup>-</sup> has been presented for sphingoid base-1-phosphate and ceramides. Error in Da has been provided from theoretical data. Average standard normalized dataset is presented here. For some lipid species identified, standard error of mean value could not be calculated due to lack of presence in all samples. Species that are known bonafide lipids of non-mammalian origin were excluded. However, where the origin in mammalian or human is unclear those entities were retained. <sup>c</sup>Fold change (fc) is the ratio relative to control based on a log<sub>2</sub> scale: \*|fc| ≥ 5.0. <sup>d</sup>Lipids common to females and males.

**Supplementary Table 3: Identified Common Lipid Species and their integration with the Sphingolipid Synthesis Pathway**

| <b>Boxed Letter</b>                                 | <b>Lipid Name</b>   | <b>Gender</b> | <b>State</b> |
|-----------------------------------------------------|---------------------|---------------|--------------|
| <b>A</b> (Sphingomyelinase, Sphingomyelin synthase) | SM(d16:1/17:0)      | Female        | Both         |
|                                                     | SM(d16:1/22:0)      | Female/Male   | Both         |
|                                                     | SM(d16:1/25:0)      | Female/Male   | Both         |
|                                                     | SM(d17:0/27:0)      | Female/Male   | Both         |
|                                                     | SM(d17:1/17:0)      | Female/Male   | Both         |
|                                                     | SM(d17:1/22:0)      | Female        | Both         |
|                                                     | SM(d17:1/24:1)      | Female/Male   | Both         |
|                                                     | SM(d18:0/12:0)      | Female/Male   | Both         |
|                                                     | SM(d18:0/13:0)      | Female/Male   | Both         |
|                                                     | SM(d18:0/14:0)      | Female        | Both         |
|                                                     | SM(d18:0/15:0)      | Female        | Both         |
|                                                     | SM(d18:0/16:0)      | Female/Male   | Both         |
|                                                     | SM(d18:0/17:0)      | Female/Male   | Both         |
|                                                     | SM(d18:0/18:1(9Z))  | Female/Male   | Both         |
|                                                     | SM(d18:0/24:1(15Z)) | Female        | Both         |
|                                                     | SM(d18:1/12:0)      | Female/Male   | Both         |
|                                                     | SM(d18:1/16:1)      | Female        | Both         |
|                                                     | SM(d18:1/17:0)      | Female/Male   | Both         |
|                                                     | SM(d18:1/19:0)      | Female/Male   | Both         |
|                                                     | SM(d18:1/22:0)      | Female        | Both         |
|                                                     | SM(d18:1/24:1(15Z)) | Female/Male   | Both         |
|                                                     | SM(d18:1/26:1(17Z)) | Female/Male   | Both         |
|                                                     | SM(d18:2/14:0)      | Female/Male   | Both         |
|                                                     | SM(d18:2/15:0)      | Female        | Both         |
|                                                     | SM(d18:2/18:1)      | Female/Male   | Both         |
|                                                     | SM(d18:2/20:1)      | Female/Male   | Both         |
|                                                     | SM(d18:2/21:0)      | Female        | Both         |
|                                                     | SM(d18:2/24:1)      | Female/Male   | Both         |
|                                                     | SM(d19:1/24:1)      | Female/Male   | Both         |
|                                                     | SM(d20:0/24:1)      | Female/Male   | Both         |
|                                                     | SM(d16:0/20:0)      | Male          | Both         |
|                                                     | SM(d16:0/22:0)      | Male          | Both         |
|                                                     | SM(d16:1/22:0)      | Female/Male   | Both         |
|                                                     | SM(d16:1/25:0)      | Female/Male   | Both         |
|                                                     | SM(d17:0/27:0)      | Female/Male   | Both         |
|                                                     | SM(d17:1/17:0)      | Female/Male   | Both         |
|                                                     | SM(d17:1/24:1)      | Female/Male   | Both         |
|                                                     | SM(d18:0/12:0)      | Female/Male   | Both         |
|                                                     | SM(d18:0/13:0)      | Female/Male   | Both         |
|                                                     | SM(d18:0/16:0)      | Female/Male   | Both         |
|                                                     | SM(d18:0/17:0)      | Female/Male   | Both         |
| SM(d18:0/18:1(9Z))                                  | Female/Male         | Both          |              |

|                                          |                         |             |      |
|------------------------------------------|-------------------------|-------------|------|
|                                          | SM(d18:0/22:0)          | Male        | Both |
|                                          | SM(d18:0/24:0)          | Male        | Both |
|                                          | SM(d18:1/12:0)          | Female/Male | Both |
|                                          | SM(d18:1/16:1)          | Male        | Both |
|                                          | SM(d18:1/17:0)          | Female/Male | Both |
|                                          | SM(d18:1/19:0)          | Female/Male | Both |
|                                          | SM(d18:1/24:1(15Z))     | Female/Male | Both |
|                                          | SM(d18:1/26:1(17Z))     | Female/Male | Both |
|                                          | SM(d18:2/14:0)          | Female/Male | Both |
|                                          | SM(d18:2/15:0)          | Male        | Both |
|                                          | SM(d18:2/18:1)          | Female/Male | Both |
|                                          | SM(d18:2/20:1)          | Female/Male | Both |
|                                          | SM(d18:2/21:0)          | Male        | Both |
|                                          | SM(d18:2/24:1)          | Female/Male | Both |
|                                          | SM(d19:0/24:1)          | Female/Male | Both |
|                                          | SM(d19:1/24:1)          | Female/Male | Both |
| <b>B</b> (Ceramidase, Ceramide synthase) | Cer(d16:1/17:0)         | Female/Male | Both |
|                                          | Cer(d16:1/22:0)         | Female      | Both |
|                                          | Cer(d18:0/13:0)         | Female/Male | Both |
|                                          | Cer(d18:0/14:0)         | Female/Male | Both |
|                                          | Cer(d18:0/16:0)         | Female/Male | Both |
|                                          | Cer(d18:0/17:0)         | Female/Male | Both |
|                                          | Cer(d18:0/h17:0)        | Female/Male | Both |
|                                          | Cer(d18:0/h24:0)        | Female/Male | Both |
|                                          | Cer(d18:1/22:0)         | Female      | Both |
|                                          | Cer(d18:1/26:0)         | Female/Male | Both |
|                                          | Cer(d18:1/26:1(17Z))    | Female      | Both |
|                                          | Cer(d18:2/14:0)         | Female/Male | Both |
|                                          | Cer(d18:2/16:0)         | Female/Male | Both |
|                                          | Cer(d18:2/20:0)         | Female/Male | Both |
|                                          | Cer(d18:2/21:0)         | Female/Male | Both |
|                                          | Cer(d18:2/23:0)         | Female/Male | Both |
|                                          | Cer(t18:0/26:0)         | Female      | Both |
|                                          | CerP(d18:0/16:0)        | Female/Male | Both |
|                                          | CerP(d18:1/14:0)        | Female/Male | Both |
|                                          | CerP(d18:1/22:0)        | Female      | Both |
|                                          | CerP(d18:1/24:0)        | Female      | Both |
|                                          | CerP(d18:1/24:1(15Z))   | Female/Male | Both |
|                                          | Ins-1-P-Cer(d18:1/22:0) | Female/Male | Both |
|                                          | SM(d16:1/24:0)          | Female/Male | Both |
|                                          | SM(d16:1/24:1)          | Female      | Both |
|                                          | SM(d16:1/25:0)          | Female/Male | Both |
|                                          | SM(d17:1/24:1)          | Female/Male | Both |
|                                          | SM(d18:0/13:0)          | Female/Male | Both |
|                                          | SM(d18:0/16:0)          | Female/Male | Both |
|                                          | SM(d18:0/26:0)          | Female/Male | Both |
|                                          | SM(d18:0/26:1(17Z))     | Female      | Both |

|                         |             |      |
|-------------------------|-------------|------|
| SM(d18:1/12:0)          | Female/Male | Both |
| SM(d18:1/14:0)          | Female/Male | Both |
| SM(d18:1/16:1)          | Female      | Both |
| SM(d18:1/17:0)          | Female/Male | Both |
| SM(d18:1/24:0)          | Female/Male | Both |
| SM(d18:1/24:1(15Z))     | Female/Male | Both |
| SM(d18:1/25:0)          | Female      | Both |
| SM(d18:1/26:1(17Z))     | Female      | Both |
| SM(d18:2/14:0)          | Female/Male | Both |
| SM(d18:2/15:0)          | Female      | Both |
| SM(d18:2/25:0)          | Female/Male | Both |
| SM(d19:1/18:0)          | Female/Male | Both |
| Cer(d16:1/17:0)         | Female/Male | Both |
| Cer(d18:0/13:0)         | Female/Male | Both |
| Cer(d18:0/14:0)         | Female/Male | Both |
| Cer(d18:0/16:0)         | Female/Male | Both |
| Cer(d18:0/17:0)         | Female/Male | Both |
| Cer(d18:0/18:1(9Z))     | Male        | Both |
| Cer(d18:0/h17:0)        | Female/Male | Both |
| Cer(d18:0/h24:0)        | Female/Male | Both |
| Cer(d18:1/26:0)         | Female/Male | Both |
| Cer(d18:2/14:0)         | Female/Male | Both |
| Cer(d18:2/16:0)         | Female/Male | Both |
| Cer(d18:2/20:0)         | Female/Male | Both |
| Cer(d18:2/21:0)         | Female/Male | Both |
| Cer(d18:2/23:0)         | Female/Male | Both |
| CerP(d18:0/16:0)        | Female/Male | Both |
| CerP(d18:1/14:0)        | Female/Male | Both |
| CerP(d18:1/24:1(15Z))   | Female/Male | Both |
| Ins-1-P-Cer(d18:1/22:0) | Female/Male | Both |
| SM(d16:1/22:1)          | Male        | Both |
| SM(d16:1/24:0)          | Female/Male | Both |
| SM(d16:1/25:0)          | Female/Male | Both |
| SM(d17:1/22:0)          | Male        | Both |
| SM(d17:1/24:1)          | Female/Male | Both |
| SM(d18:0/13:0)          | Female/Male | Both |
| SM(d18:0/16:0)          | Female/Male | Both |
| SM(d18:0/18:0)          | Male        | Both |
| SM(d18:0/24:0)          | Male        | Both |
| SM(d18:0/26:0)          | Female/Male | Both |
| SM(d18:1/12:0)          | Female/Male | Both |
| SM(d18:1/14:0)          | Female/Male | Both |
| SM(d18:1/17:0)          | Female/Male | Both |
| SM(d18:1/20:0)          | Male        | Both |
| SM(d18:1/24:0)          | Female/Male | Both |
| SM(d18:1/24:1(15Z))     | Female/Male | Both |
| SM(d18:1/26:1(17Z))     | Female/Male | Both |



|                                                  |                                                   |             |      |
|--------------------------------------------------|---------------------------------------------------|-------------|------|
|                                                  | SM(d18:2/14:0)                                    | Female/Male | Both |
|                                                  | SM(d18:2/21:0)                                    | Male        | Both |
|                                                  | SM(d18:2/22:1)                                    | Male        | Both |
|                                                  | SM(d18:2/25:0)                                    | Female/Male | Both |
|                                                  | SM(d19:1/18:0)                                    | Female/Male | Both |
| <b>C</b> (Sphingosine kinase, S-1-P phosphatase) | C16 Sphinganine-1-phosphate                       | Female/Male | Both |
|                                                  | C17 Sphinganine-1-phosphate                       | Female/Male | Both |
|                                                  | C17 Sphingosine-1-phosphate                       | Female/Male | Both |
|                                                  | C19 Sphingosine-1-phosphate                       | Female/Male | Both |
|                                                  | Phytosphingosine 1-phosphate                      | Female/Male | Both |
|                                                  | (4E,6E,d14:2) sphingosine                         | Female/Male | Both |
|                                                  | (4E,8E,10E-d18:3)sphingosine                      | Female/Male | Both |
|                                                  | 6-hydroxysphingosine                              | Female/Male | Both |
|                                                  | C16 Sphinganine                                   | Female/Male | Both |
|                                                  | C17 Sphinganine                                   | Female/Male | Both |
|                                                  | Calyxinin                                         | Female/Male | Both |
|                                                  | Capnine                                           | Female/Male | Both |
|                                                  | Fumonisin B2                                      | Female/Male | Both |
|                                                  | Fumonisin B4                                      | Female/Male | Both |
|                                                  | Fumonisin C1                                      | Female      | Both |
|                                                  | Fumonisin C3                                      | Female      | Both |
|                                                  | Hemsleyin imine A                                 | Female/Male | Both |
|                                                  | iso (4E,15-methyl-d16:1) sphingosine <sup>a</sup> | Female      | Both |
|                                                  | N,N,N-trimethyl-sphingosine                       | Female/Male | Both |
|                                                  | N,N-dimethylsphingosine                           | Female/Male | Both |
|                                                  | Obscuraminol A                                    | Female/Male | Both |
|                                                  | Penazetidine A                                    | Female/Male | Both |
|                                                  | Phytosphingosine                                  | Female/Male | Both |
|                                                  | Plakoside A                                       | Female/Male | Both |
|                                                  | Prosafrinine                                      | Female/Male | Both |
|                                                  | R-Dysidazirine                                    | Female/Male | Both |
|                                                  | Rhizochalinin D                                   | Female/Male | Both |
|                                                  | Sphinganine                                       | Female/Male | Both |
|                                                  | Sphingofungin A                                   | Female/Male | Both |
|                                                  | Sphingofungin E                                   | Female/Male | Both |
|                                                  | Sulfamisterin                                     | Female/Male | Both |
|                                                  | Termitomycesphin A                                | Female/Male | Both |
|                                                  | Xestoaminol C                                     | Female/Male | Both |
|                                                  | (4E,6E,d14:2) sphingosine                         | Female/Male | Both |
|                                                  | (4E,8E,10E-d18:3)sphingosine                      | Female/Male | Both |
|                                                  | (4E,8Z,d18:2) sphingosine                         | Male        | Both |
|                                                  | 6-hydroxysphingosine                              | Female/Male | Both |
|                                                  | C16 Sphinganine                                   | Female/Male | Both |
|                                                  | C17 Sphinganine                                   | Female/Male | Both |
|                                                  | Calyxinin                                         | Female/Male | Both |
| Capnine                                          | Female/Male                                       | Both        |      |

|                                                   |             |      |
|---------------------------------------------------|-------------|------|
| Fumonisin B2                                      | Female/Male | Both |
| Fumonisin B4                                      | Female/Male | Both |
| Hemsleyin imine A                                 | Female/Male | Both |
| iso (4E,15-methyl-d16:1) sphingosine <sup>a</sup> | Male        | Both |
| N,N,N-trimethyl-sphingosine                       | Female/Male | Both |
| N,N-dimethylsphingosine                           | Female/Male | Both |
| Obscuraminol A                                    | Female/Male | Both |
| Penazetidine A                                    | Female/Male | Both |
| Phytosphingosine                                  | Female/Male | Both |
| Plakoside A                                       | Female/Male | Both |
| Prosafrinine                                      | Female/Male | Both |
| R-Dysidazirine                                    | Female/Male | Both |
| Rhizochalinin D                                   | Female/Male | Both |
| Sphinganine                                       | Female/Male | Both |
| Sphingofungin A                                   | Female/Male | Both |
| Sphingofungin E                                   | Female/Male | Both |
| Sulfamisterin                                     | Female/Male | Both |
| Termitomycesphin A                                | Female/Male | Both |
| Xestoaminol C                                     | Female/Male | Both |
| C16 Sphinganine-1-phosphate                       | Female/Male | Both |
| C16 Sphingosine-1-phosphate                       | Female/Male | Both |
| C17 Sphinganine-1-phosphate                       | Female/Male | Both |
| C17 Sphingosine-1-phosphate                       | Female/Male | Both |
| C19 Sphingosine-1-phosphate                       | Female/Male | Both |
| Phytosphingosine 1-phosphate                      | Female/Male | Both |

---

Letters **A**, **B** and **C** indicates the location of the enzyme responsible for conversion of the identified lipid species as depicted in Figure 1. Common lipids have been indicated as Female/Male.

**Supplementary Table 4: Human Metabolome Database Comparison of Unique Sphingolipid and Ceramide Species in Normotensive and Hypertensive DBA/2J Mouse Aqueous Humor**

| Lipid Species <sup>a</sup> | Theoretical m/z <sup>b</sup> | m/z                                                                                                                                                                                                                          | Average lipid amount (pmol per species/ $\mu$ g protein) <sup>c</sup> | LIPIDMAPS ID                                                                                                                                                                                                                                                                                        | PUBCHEM ID | HMDB Accession <sup>d</sup> |
|----------------------------|------------------------------|------------------------------------------------------------------------------------------------------------------------------------------------------------------------------------------------------------------------------|-----------------------------------------------------------------------|-----------------------------------------------------------------------------------------------------------------------------------------------------------------------------------------------------------------------------------------------------------------------------------------------------|------------|-----------------------------|
| CerP(d18:1/24:0)           | 728.6                        | 727.7                                                                                                                                                                                                                        | 1.4                                                                   | LMSP02050008                                                                                                                                                                                                                                                                                        | 7850645    | HMDB10704                   |
| Cer(d18:1/22:0)            | 620.6                        | 621.2                                                                                                                                                                                                                        | 0.5                                                                   | LMSP02010008                                                                                                                                                                                                                                                                                        | 7850626    | HMDB04952                   |
| Cer(d18:0/24:1(15Z))       | 648.6                        | 649.3                                                                                                                                                                                                                        | 0.0                                                                   | LMSP02020011                                                                                                                                                                                                                                                                                        | 7850635    | HMDB11769                   |
| Cer(d18:1/18:1(9Z))        | 562.5                        | 563.3                                                                                                                                                                                                                        | 47.0                                                                  | LMSP02010003                                                                                                                                                                                                                                                                                        | 4266351    | HMDB04948                   |
| Cer(d18:1/26:1(17Z))       | 674.6                        | 675.6                                                                                                                                                                                                                        | 2.0                                                                   | LMSP02010010                                                                                                                                                                                                                                                                                        | 7850628    | HMDB04954                   |
| Sphinganine-phosphate      | 380.3                        | 380.8                                                                                                                                                                                                                        | 53.9                                                                  | LMSP01050002                                                                                                                                                                                                                                                                                        | 7850620    | HMDB01383                   |
| Cer(d18:0/18:1(9Z))        | 564.5                        | 565.2                                                                                                                                                                                                                        | 3.4                                                                   | LMSP02020015                                                                                                                                                                                                                                                                                        | 49703627   | HMDB11763                   |
| Cer(d18:1/18:1(9Z))        | 562.5                        | 563.3                                                                                                                                                                                                                        | 0.0                                                                   | LMSP02010003                                                                                                                                                                                                                                                                                        | 4266351    | HMDB04948                   |
| Cer(d18:0/24:1(15Z))       | 648.6                        | 649.6                                                                                                                                                                                                                        | 4.1                                                                   | LMSP02020011                                                                                                                                                                                                                                                                                        | 7850635    | HMDB11769                   |
|                            |                              | <b>Localization</b>                                                                                                                                                                                                          |                                                                       | <b>Function</b>                                                                                                                                                                                                                                                                                     |            |                             |
| HMDB10704                  |                              | Extracellular, membrane, all tissues                                                                                                                                                                                         |                                                                       | Cell signaling, energy source, fuel and energy storage, fuel or energy source, membrane component, membrane integrity/stability                                                                                                                                                                     |            |                             |
| HMDB04952                  |                              | Extracellular, membrane, Muscle, Skeletal Muscle, Fibroblasts, Intestine, Neuron, Pancreas, Placenta, Teste, Kidney, Liver. Thyroid Gland, Brain, Myelin, Skin, Nerve Cells, Platelet, Spleen, Stratum Corneum, Keratinocyte |                                                                       | Cell signaling, Component of Glycerolipid metabolism, Component of Glycerophospholipid metabolism, Component of Glycosphingolipid metabolism, Component of Prostaglandin and leukotriene metabolism, Fuel and energy storage, Fuel or energy source, Membrane integrity/stability, Second messenger |            |                             |
| HMDB11769                  |                              | Extracellular, membrane                                                                                                                                                                                                      |                                                                       | Cell signaling, Fuel and energy storage, Fuel or energy source, Membrane integrity/stability                                                                                                                                                                                                        |            |                             |
| HMDB04948                  |                              | Extracellular, membrane                                                                                                                                                                                                      |                                                                       | Cell signaling, Component of Glycerolipid metabolism, Component of Glycerophospholipid metabolism, Component of Glycosphingolipid metabolism, Component of Prostaglandin and leukotriene metabolism, Fuel and energy storage, Fuel or energy source, Membrane integrity/stability, Second messenger |            |                             |
| HMDB01383                  |                              | Cytoplasm<br>Extracellular, Membrane, Endoplasmic reticulum                                                                                                                                                                  |                                                                       | Cell signaling, Component of Glycosphingolipid metabolism, Fuel and energy storage, Fuel or energy source, Membrane integrity/stability                                                                                                                                                             |            |                             |
| HMDB11763                  |                              | Extracellular, Membrane                                                                                                                                                                                                      |                                                                       | Cell signaling, Fuel and energy storage, Fuel or energy source, Membrane integrity/stability                                                                                                                                                                                                        |            |                             |

|           |                         |                                                                                                                                                                                                                                                                                                     |
|-----------|-------------------------|-----------------------------------------------------------------------------------------------------------------------------------------------------------------------------------------------------------------------------------------------------------------------------------------------------|
| HMDB04948 | Extracellular, Membrane | Cell signaling, Component of Glycerolipid metabolism, Component of Glycerophospholipid metabolism, Component of Glycosphingolipid metabolism, Component of Prostaglandin and leukotriene metabolism, Fuel and energy storage, Fuel or energy source, Membrane integrity/stability, Second messenger |
| HMDB11769 | Extracellular, Membrane | Cell signaling, Fuel and energy storage, Fuel or energy source, Membrane integrity/stability                                                                                                                                                                                                        |

---

<sup>a</sup>The lipid species identification is based on Lipidmaps database, used as a \*.csv file for bioinformatic analyses with MZmine 2.9 program. <sup>b</sup>The theoretical mass by charge ratio (m/z) presented from Lipidmaps is in positive ion mode [M+H]<sup>+</sup> for sphingomyelin and sphingoid base. Whereas negative ion mode [M-H]<sup>-</sup> has been presented for sphingoid base-1-phosphate and ceramides. <sup>c</sup>Average standard normalized dataset found to have an <sup>d</sup>HMDB identifier is presented here. Species that are known bonafide lipids of non-mammalian origin were excluded. However, where the origin in mammalian or human is unclear those entities were retained
